# Supplementary material for: Arrays of nano-light-mixers for enhanced broadband and omnidirectional absorption of solar radiation for solar energy technologies
Source: Royal Society of Chemistry journal article supplement (doi:10.1039/d4nr05050a), 2025-01-01
Supplement: d4nr05050a1.pdf [file d4nr05050a1.pdf]

**Arrays nano-light-mixers for enhanced broadband and omnidirectional absorption of the solar radiation for thin-film silicon photovoltaics**

**Supplementary information**

Ankit Kumar<sup>1</sup>, Erez Golan<sup>2</sup>, Nadav Aharon<sup>2</sup>, Gil Shalev<sup>1,3</sup>

<sup>1</sup>School of Electrical Engineering, Ben-Gurion University of the Negev, Beer-Sheva 84105, Israel

<sup>2</sup>Nano Fabrication Center Ilse Katz Institute for Nanoscale Science and Technology, Ben-Gurion of the Negev, P.O.B653, Beer-Sheva 8410501, Israel.

<sup>3</sup>The Ilse-Katz Institute for Nanoscale Science and Technology, Ben-Gurion University of the Negev, Beer-Sheva 8410501, Israel

**SI1: Absorptivity spectra of NLM arrays, LF arrays and NP arrays for selected AOI values**

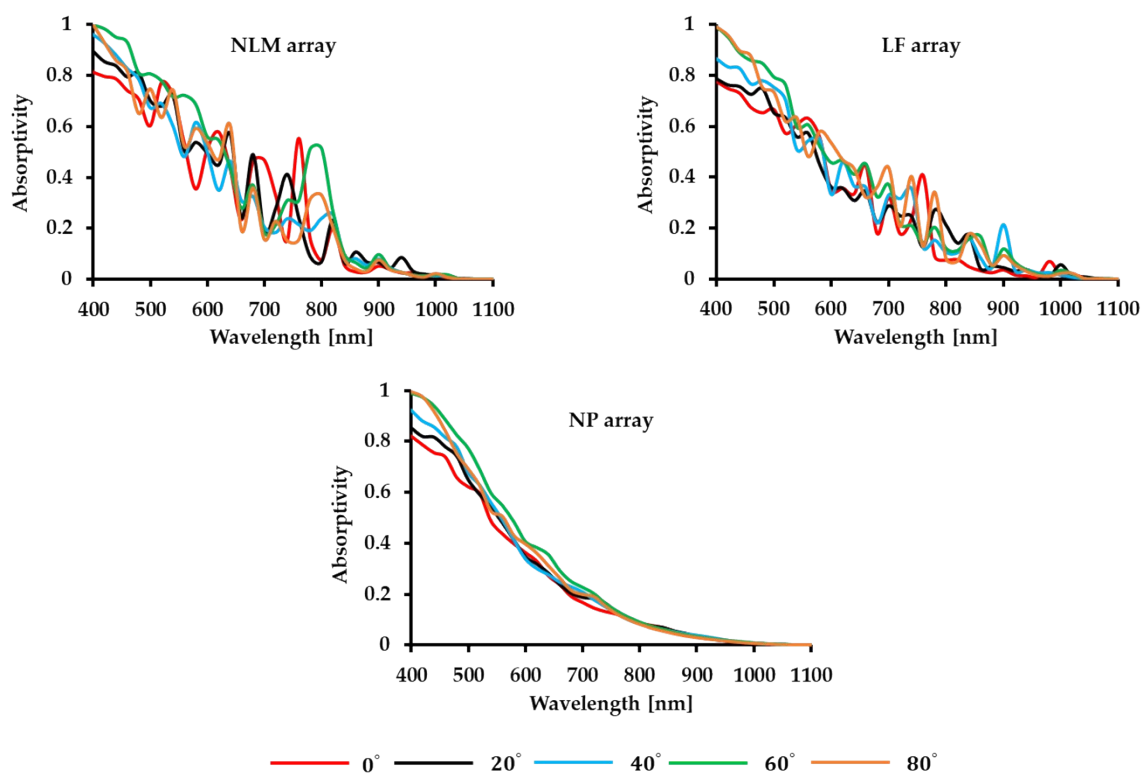

**Figure SI1.** Absorptivity spectra for selected AOI values of a NP, LF and NLM arrays.

**SI2: Far-field NSOM microscopy images for reflection spectra ( $P=600$  nm)**

(a)

NLM array,  $P = 600\text{nm}$ ,  $D_t = 550\text{nm}$ ,  $D_b = 320\text{nm}$

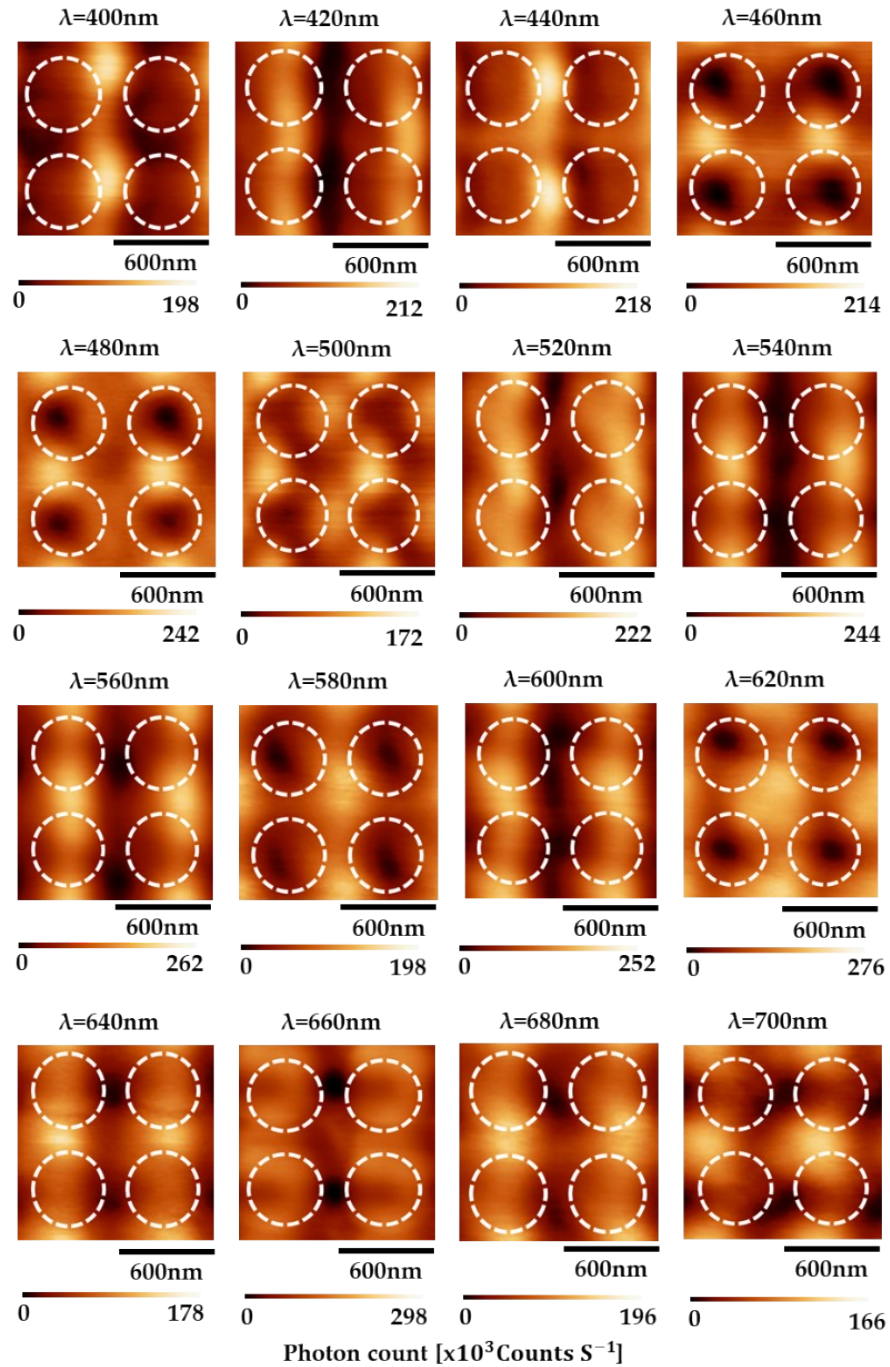

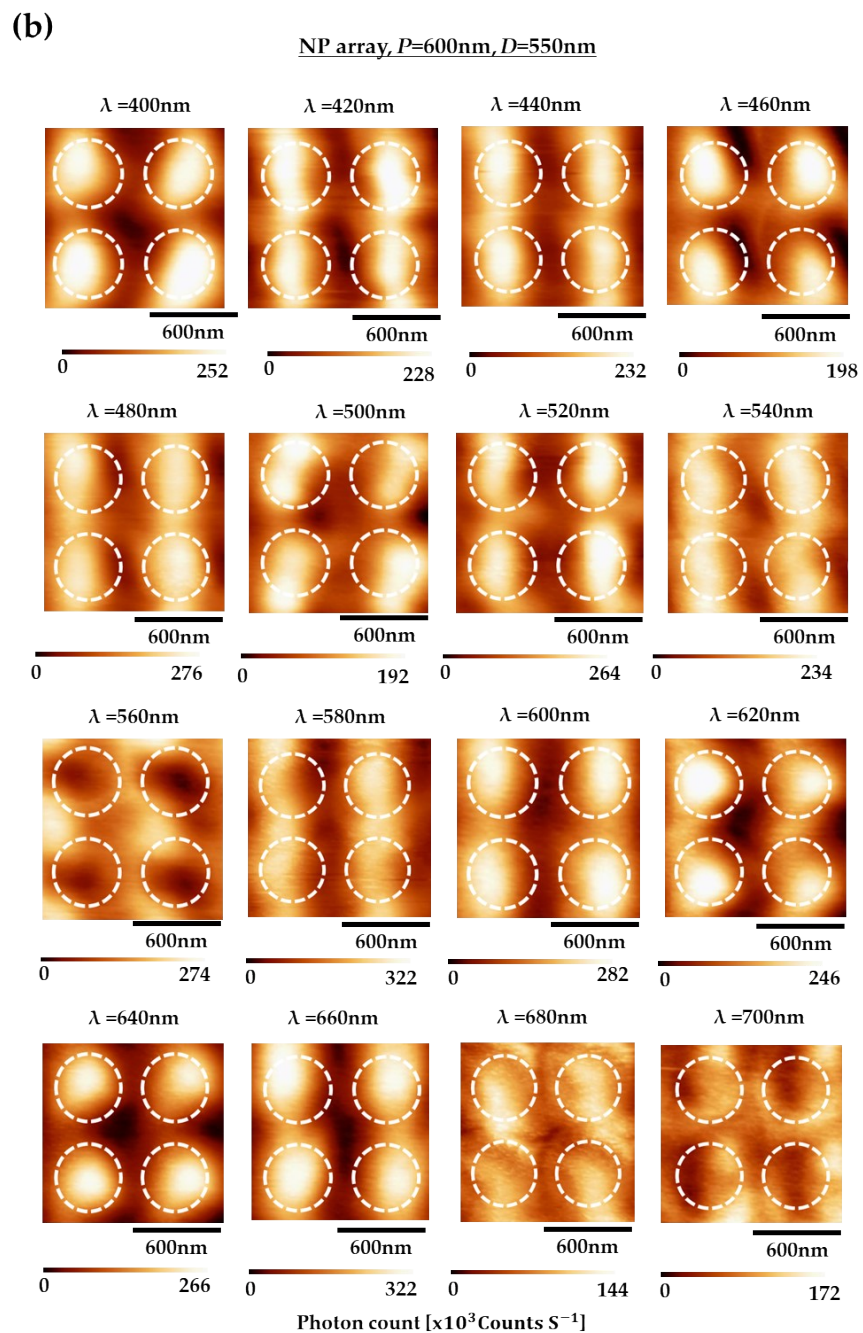

**Figure S12.** (a) NSOM far-field microscopy for NLM arrays. (b) NSOM far-field microscopy for NP arrays. The location of the structures is marked with dashed white lines.

### SI3: Non-scaled far-field NSOM images

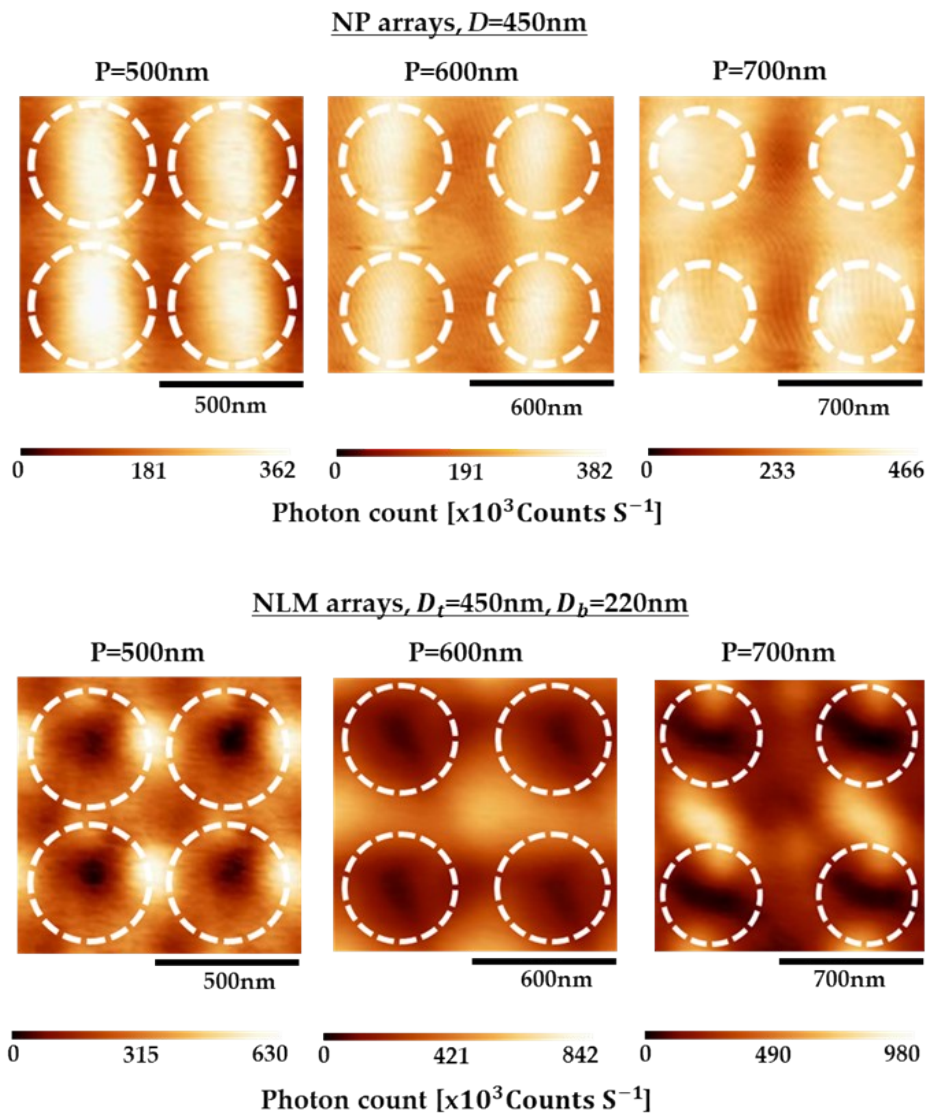

**Figure SI3.** NSOM near-field measurements for NP and NLM arrays. The location of the dielectric is marked with dashed white lines.

**SI4: Far-field NSOM for NLM of various periods**

(a)

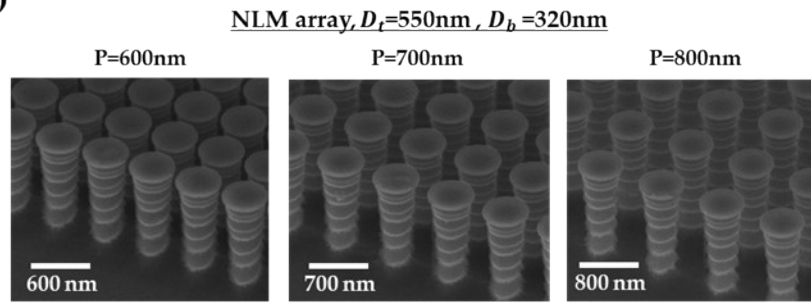

(b)

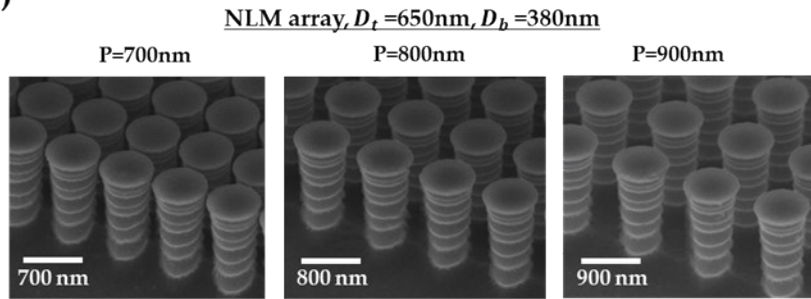

(c)

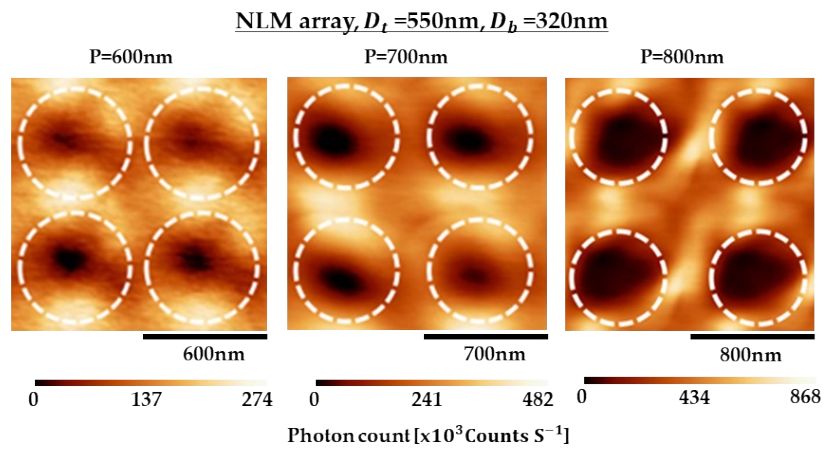

(d)

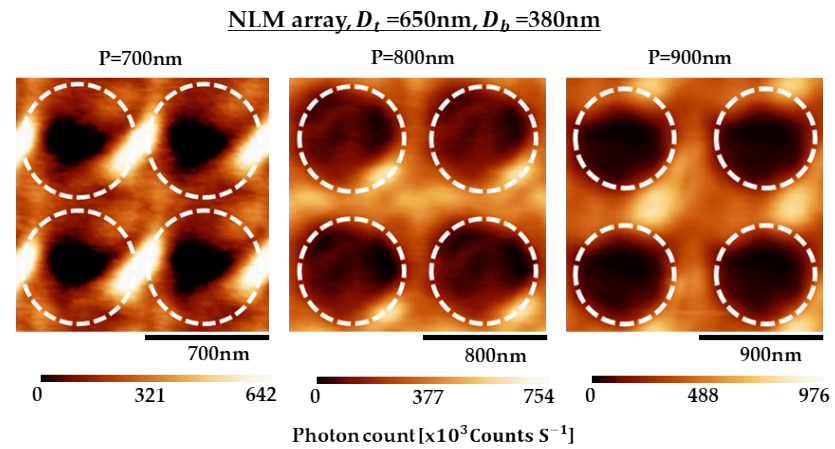

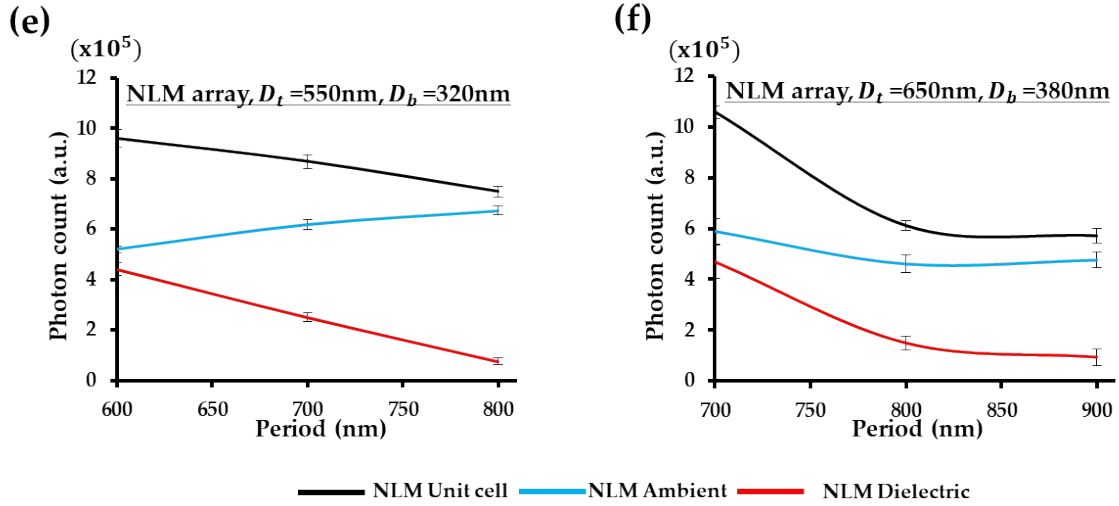

**Figure SI4.** (a) SEM images of NLM arrays for  $P=600, 700$  and  $800$  nm,  $D_t=550$  nm, and the NLM array with  $D_b=320$  nm. (b) SEM images of NLM arrays for  $P=700, 800$  and  $900$  nm,  $D_t=650$  nm, and the NLM array with  $D_b=380$  nm. (c) NSOM far-field measurements for NLM arrays for top and bottom diameter  $D_t=550\text{nm}$  and  $D_b=320\text{nm}$ . (d) NSOM far-field measurements for NLM arrays for top and bottom diameter  $D_t=650\text{nm}$  and  $D_b=380\text{nm}$ . The location of the dielectric is marked with dashed white lines. (e) and (f) NSOM far-field count vs. array period for NLM arrays. Each data point is an average of four unit cells and the error bars are the respective standard deviations.

### SI5: Non-scaled Near-field NSOM images

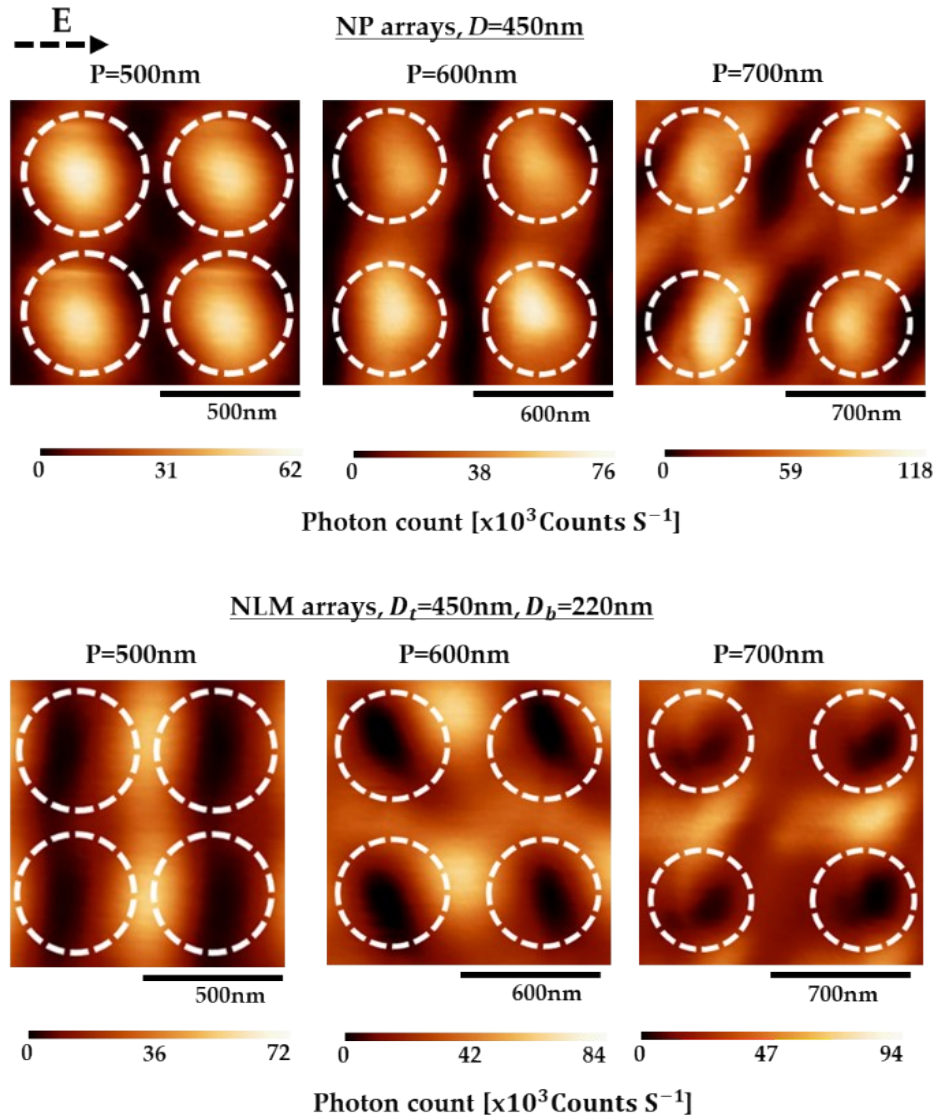

**Figure SI5.** NSOM near-field measurements for NP and NLM arrays. The location of the dielectric is marked with dashed white lines.

**SI6: Near-field NSOM for NLM of various periods**

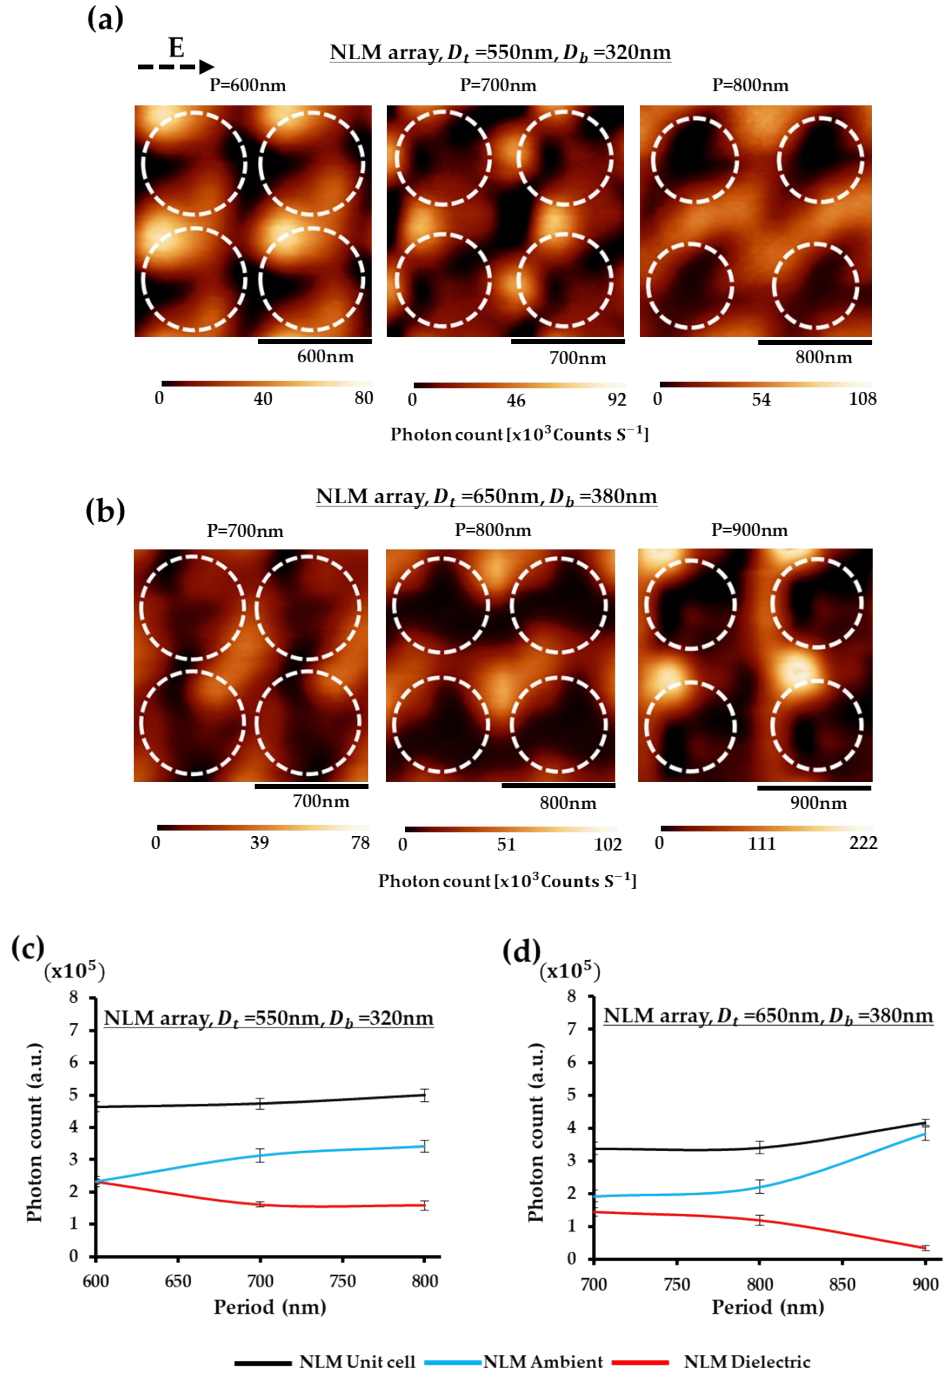

**Figure SI6.** (a) NSOM Near-field measurements for NLM arrays for top and bottom diameter  $D_t=550\text{nm}$  and  $D_b=320\text{nm}$ . (b) NSOM far-field measurements for NLM arrays for top and bottom diameter  $D_t=650\text{nm}$  and  $D_b=380\text{nm}$ . The location of the dielectric is marked with dashed white lines. (c) and (d) NSOM far-field count vs. array period for NLM arrays. Each data point is an average of four unit cells and the error bars are the respective standard deviations.
